# Supplementary material
Source: publisher figshare collection journal article supplement (https://frontiersin.figshare.com/ndownloader/files/25321325)
Supplement: Supplementary file 1 [file 25321325]

| **Variable** | **Sum of squares** | **Mean squares** | **df** | **Dendf** | **F Value** | **Pr(>F)** |  |
| --- | --- | --- | --- | --- | --- | --- | --- |
| Size | 1299731 | 1299731 | 1 | 49.897 | 0.3818 | 0.53946 |  |
| Education | 6724019 | 6724019 | 1 | 49.522 | 1.9751 | 0.16615 |  |
| Age | 74293 | 74293 | 1 | 49.942 | 0.0218 | 0.88315 |  |
| Financing | 17490623 | 17490623 | 2 | 48.328 | 2.5688 | 0.08705 | **.** |
| Seed_type | 19345352 | 19345352 | 4 | 49.148 | 1.4206 | 0.24109 |  |
| Seedrate | 2793779 | 2793779 | 1 | 46.957 | 0.8206 | 0.36962 |  |
| Plantdate | 14825868 | 14825868 | 1 | 49.907 | 4.3549 | 0.04203 | ***** |
| N | 4070665 | 4070665 | 1 | 48.657 | 1.1957 | 0.27957 |  |
| Waterhours | 1587467 | 1587467 | 1 | 48.019 | 0.4663 | 0.49798 |  |
| Chemicals | 148792 | 148792 | 1 | 49.995 | 0.0437 | 0.83525 |  |
| |  | | --- | | 103998 |  |  |  |  |  |  |
|  | 3404433 |  |  |  |  |  |  |
| Marginal R2 | 0.279 |  |  |  |  |  |  |
| Conditional R2 | 0.301 |  |  |  |  |  |  |
| significance codes: 0 ‘***’ 0.001 ‘**’ 0.01 ‘*’ 0.05 ‘.’ 0.1 ‘ ’ 1  df= degrees of freedom, Dendf= Denominator degrees of freedom, | | | | | | | |

**Supplementary Table 1.** Type III analysis of variance (ANOVA) table with Satterthwaite's method. The random effect of location is included with the variation (sum of squares). The marginal r-squared considers the variance of the fixed effects, and the conditional r-squared accounts for both the fixed and random effects (location).
